# Supplementary material for: ARIP: A Tool for Precise Interatomic Contact Area and Volume Calculation in Proteins
Source: MDPI journal article supplement (doi:10.3390/ijms25105176), 2024-05-09
Supplement: s1 [file s1]

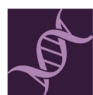

# ARIP: a tool for precise interatomic contact area and volume calculation in proteins

Tao Ma <sup>1,2,3,†</sup>, Wenhui Li <sup>1,2,3,†</sup>, Zhiping Tang <sup>1,2,3</sup>, Xiangwei Sun <sup>1,2,3</sup>, Lijuan Li <sup>1,2,3</sup>, Zhonghua Liu <sup>1,2,3,\*</sup> and Gaihua Zhang <sup>1,2,3,\*</sup>

<sup>1</sup> The National and Local Joint Engineering Laboratory of Animal Peptide Drug Development, College of Life Sciences, Hunan Normal University, Changsha 410081, China; xiangtao312@outlook.com (T.M.); whliabcc@gmail.com (W.L.); pingguotang498@gmail.com (Z.T.); xiangsun023@gmail.com (X.S.); ligs0116@gmail.com (L.L.)

<sup>2</sup> Peptide and Small Molecule Drug R&D Platform, Furong Laboratory, Hunan Normal University, Changsha 410081, China

<sup>3</sup> Institute of Interdisciplinary Studies, Hunan Normal University, Changsha 410081, China

\* Correspondence: liuzh@hunnu.edu.cn (Z.L.); ghzhang@hunnu.edu.cn (G.Z.)

† These authors contributed equally to this work.

## Supplemental Figures and Tables

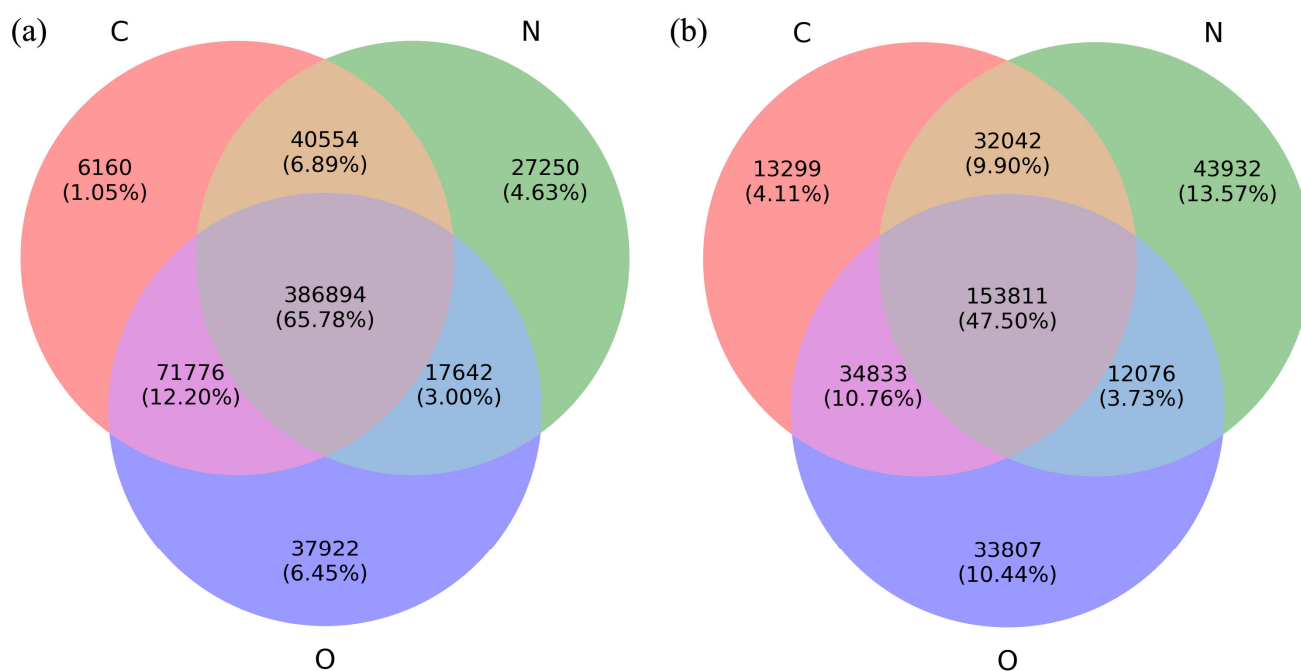

**Figure S1.** The number of nearest water molecules to the "C", "N" and "O" atoms of the peptide plane without (a) or with interference (b) from other hydrophilic atoms.

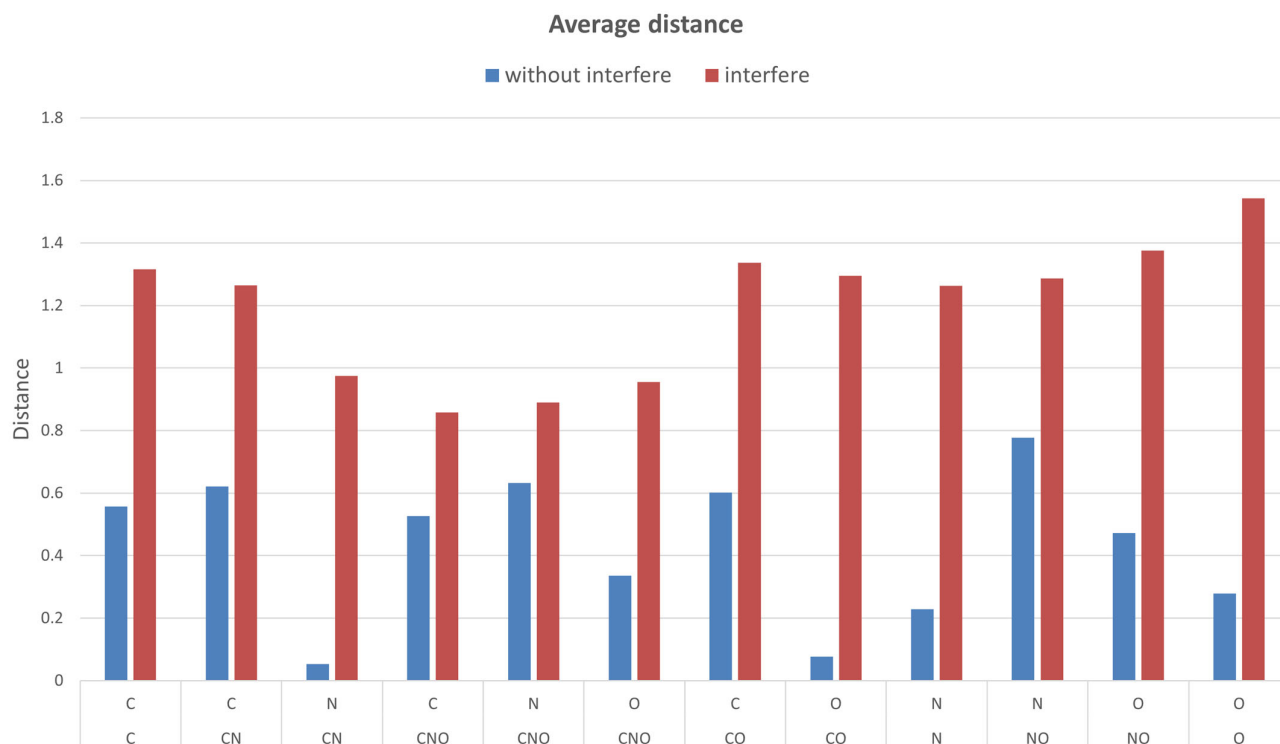

**Figure S2.** The average distance (Å) of the nearest water molecules to the “C”, “N” and “O” atoms of the peptide plane without or with interference from other hydrophilic atoms.

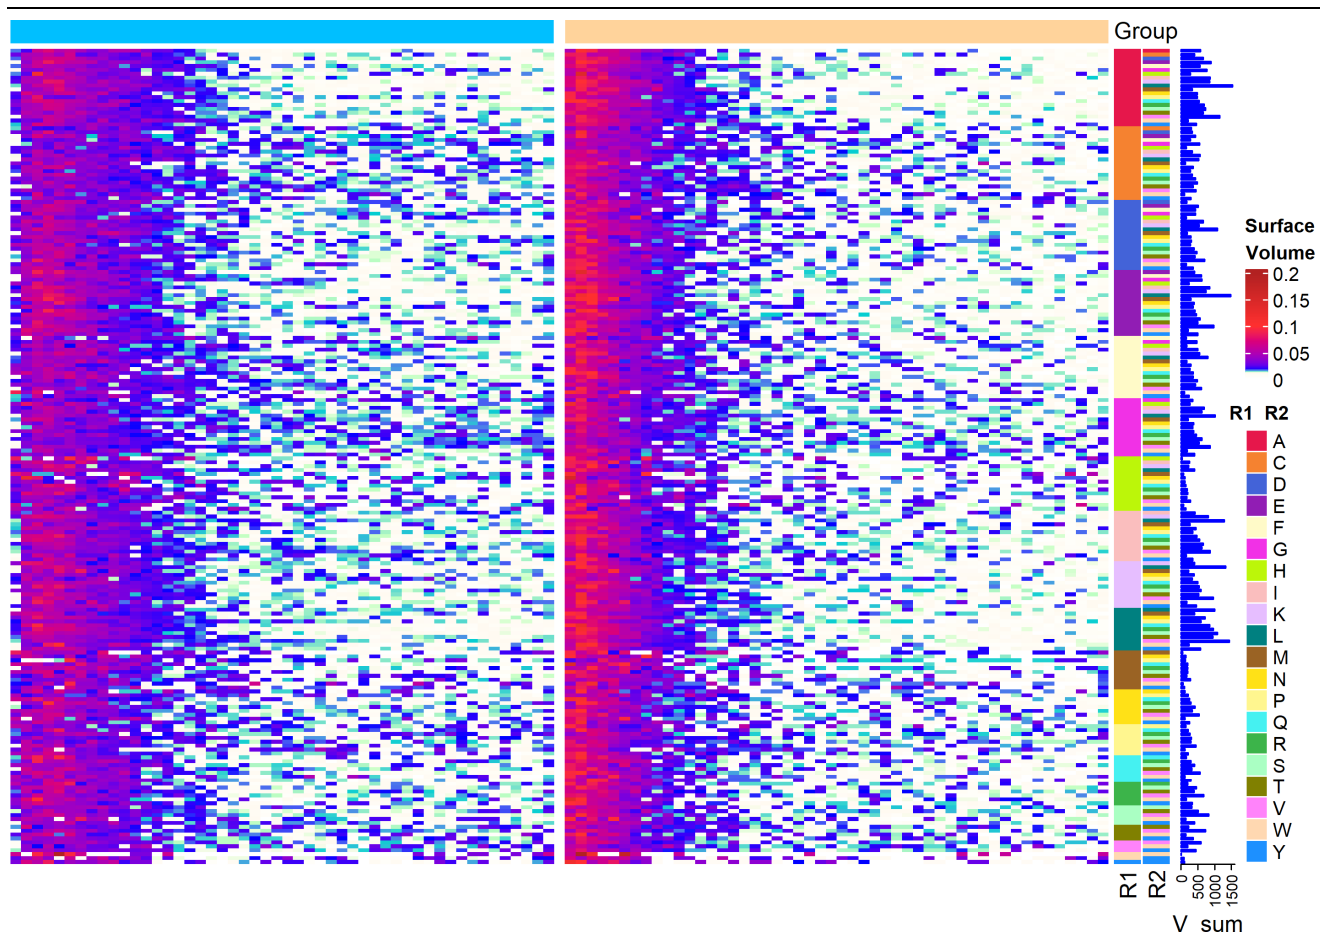

**Figure S3.** Heatmaps for small contacts area and contacts volume in intra-chain interactions. Values less than  $5\text{\AA}^2/\text{\AA}^3$  were aggregated using a bin size of  $0.1\text{\AA}^2/\text{\AA}^3$  for percentage calculation.

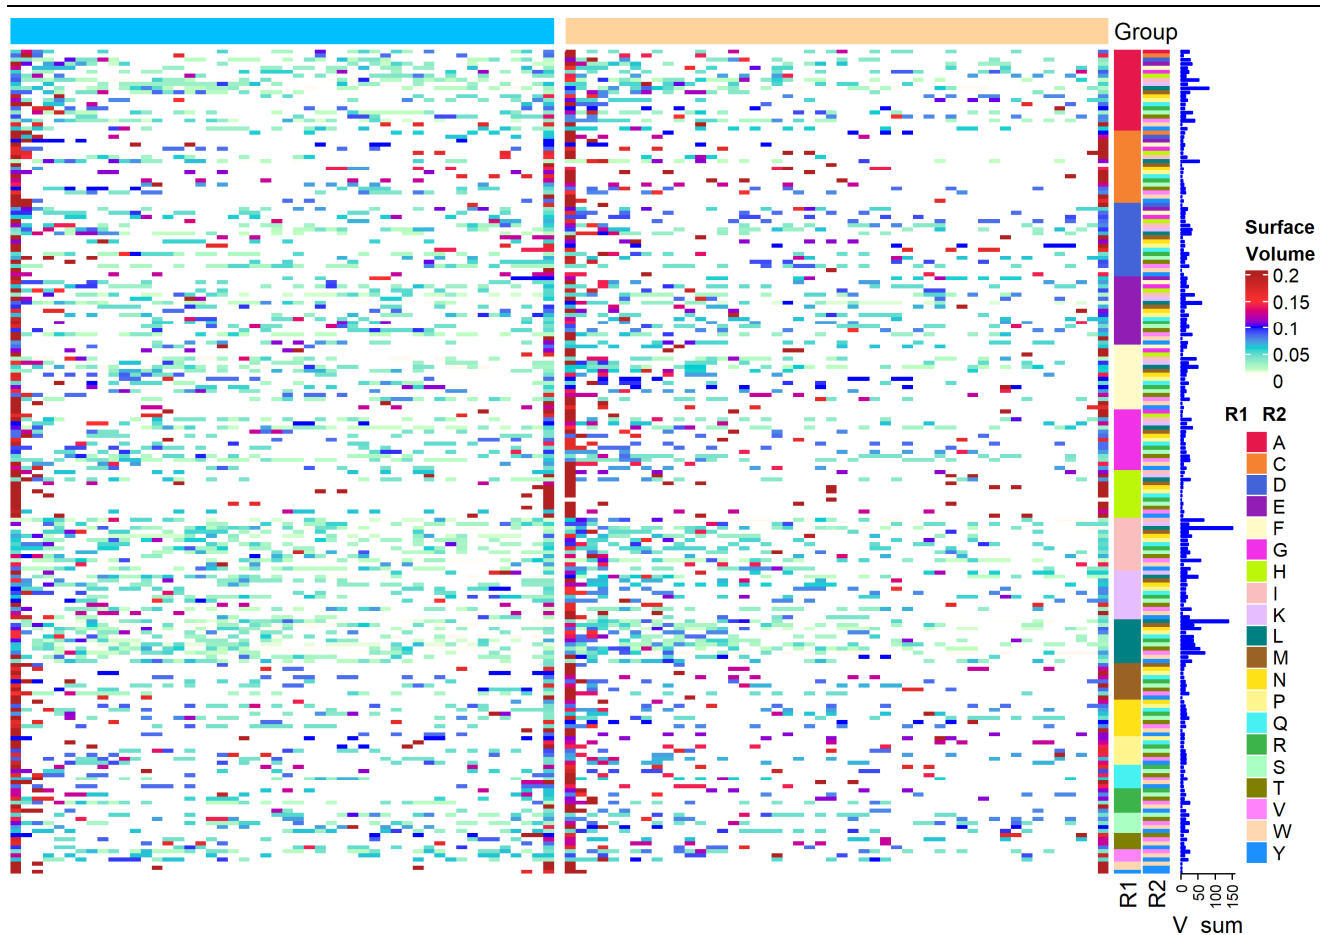

**Figure S4.** Heatmaps for small contacts area and contacts volume in inter-chain interactions. The number of inter-chain contacts is significantly lower than that in intra-chain interactions. Interestingly, the percentage distributions in inter-chain interactions exhibit a high degree of similarity between contact areas and contact volumes.

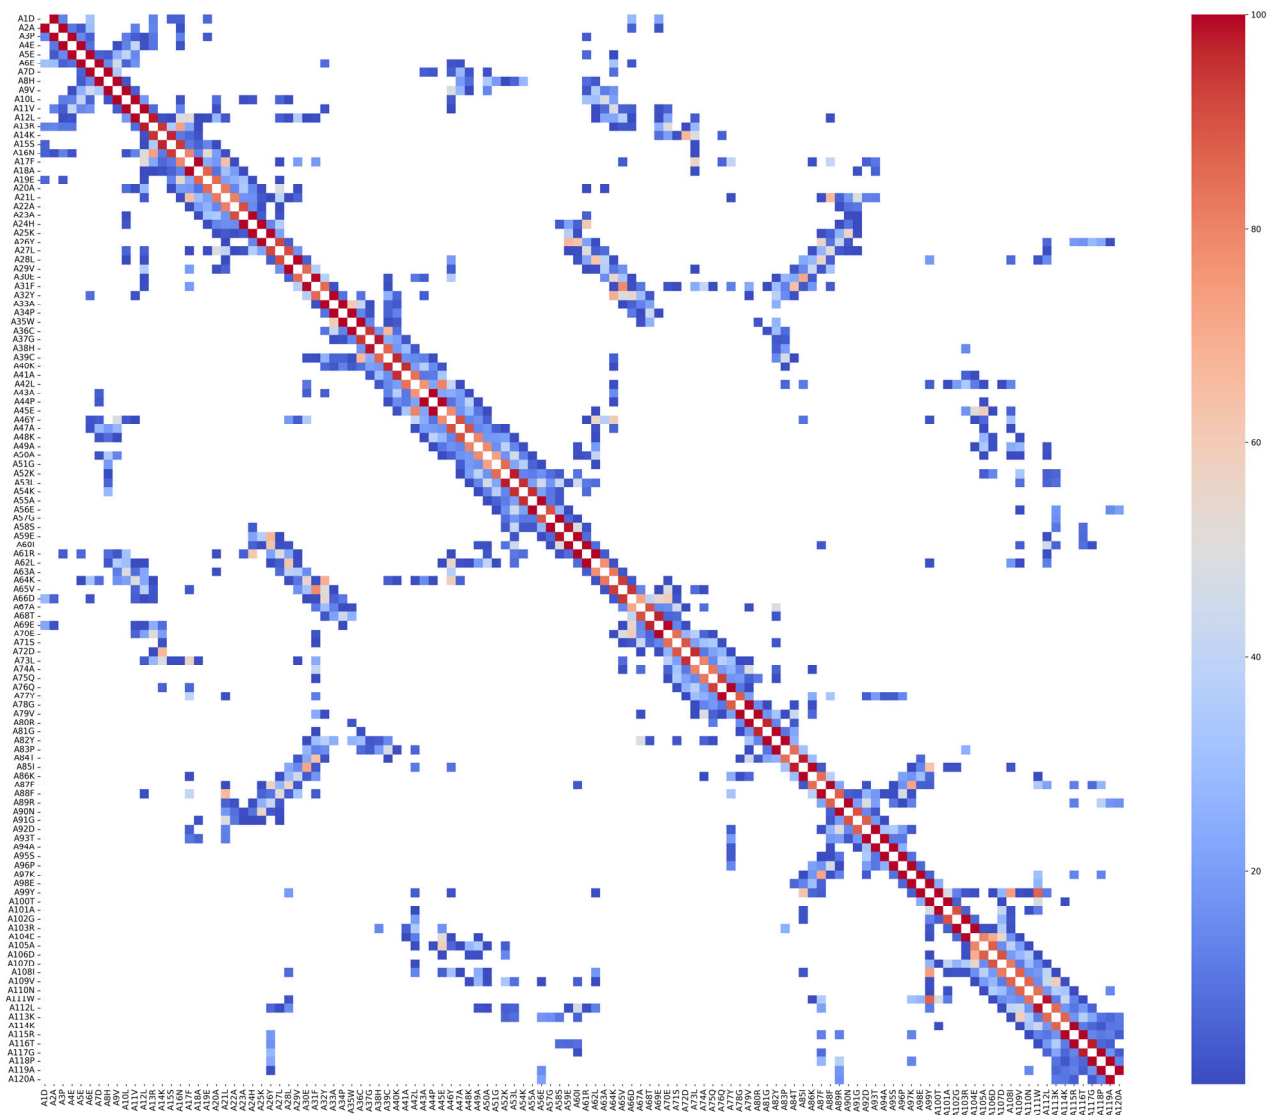

**Figure S5.** The average contacted volume of residue-residue contacts in all 1MEK models (the maximum volume value is anchoring as  $100\text{\AA}^3$  here without using the “-p” switch).

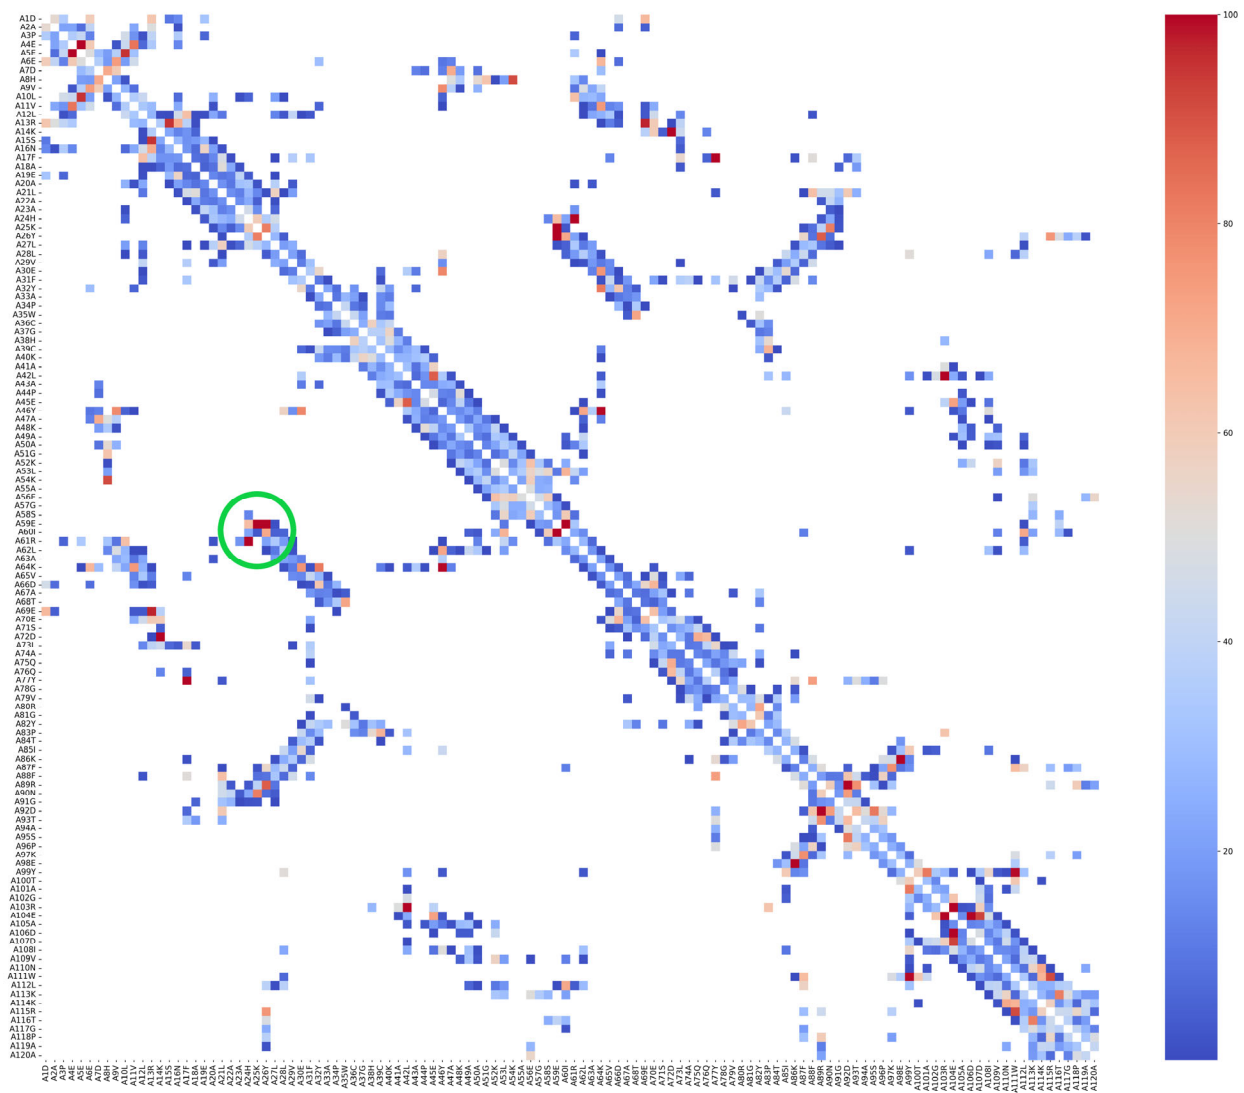

**Figure S6.** The range (Max-Min) of residue-residue contacted volumes in all 1MEK models.

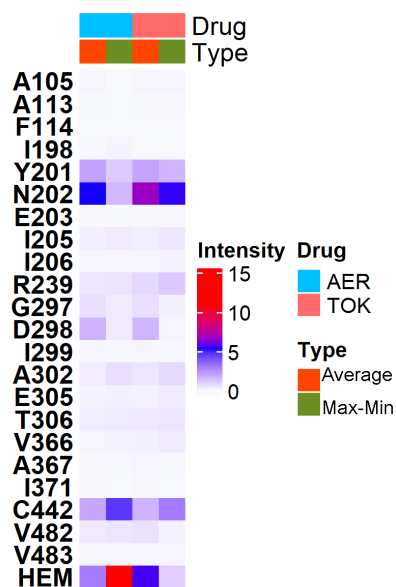

**Figure S7.** The average and the range (Max-Min) of the interaction volume of CYP17A1 to abiraterone (AER) and galeterone (TOK).

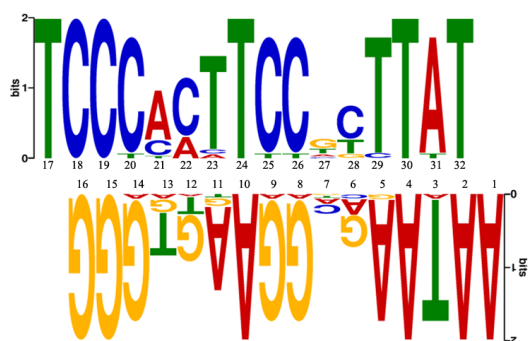

**Figure S8.** Motif recognition of the DNA alignments of the 22 DNA sequences from SPI1-DNA complexes with MEM v5.5.5

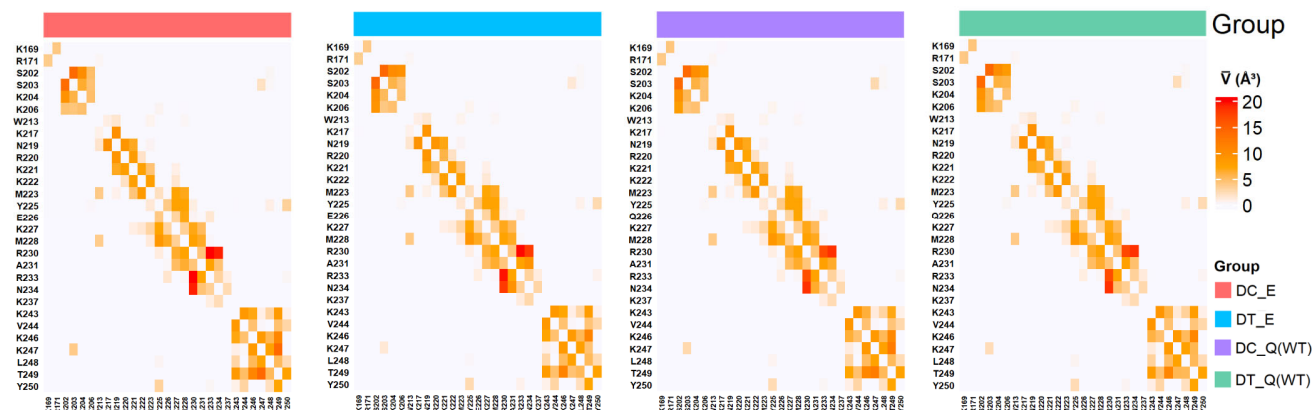

**Figure S9.** The average of interaction volume of the residue-residue contact in the four groups of SPI1-DNA complexes.

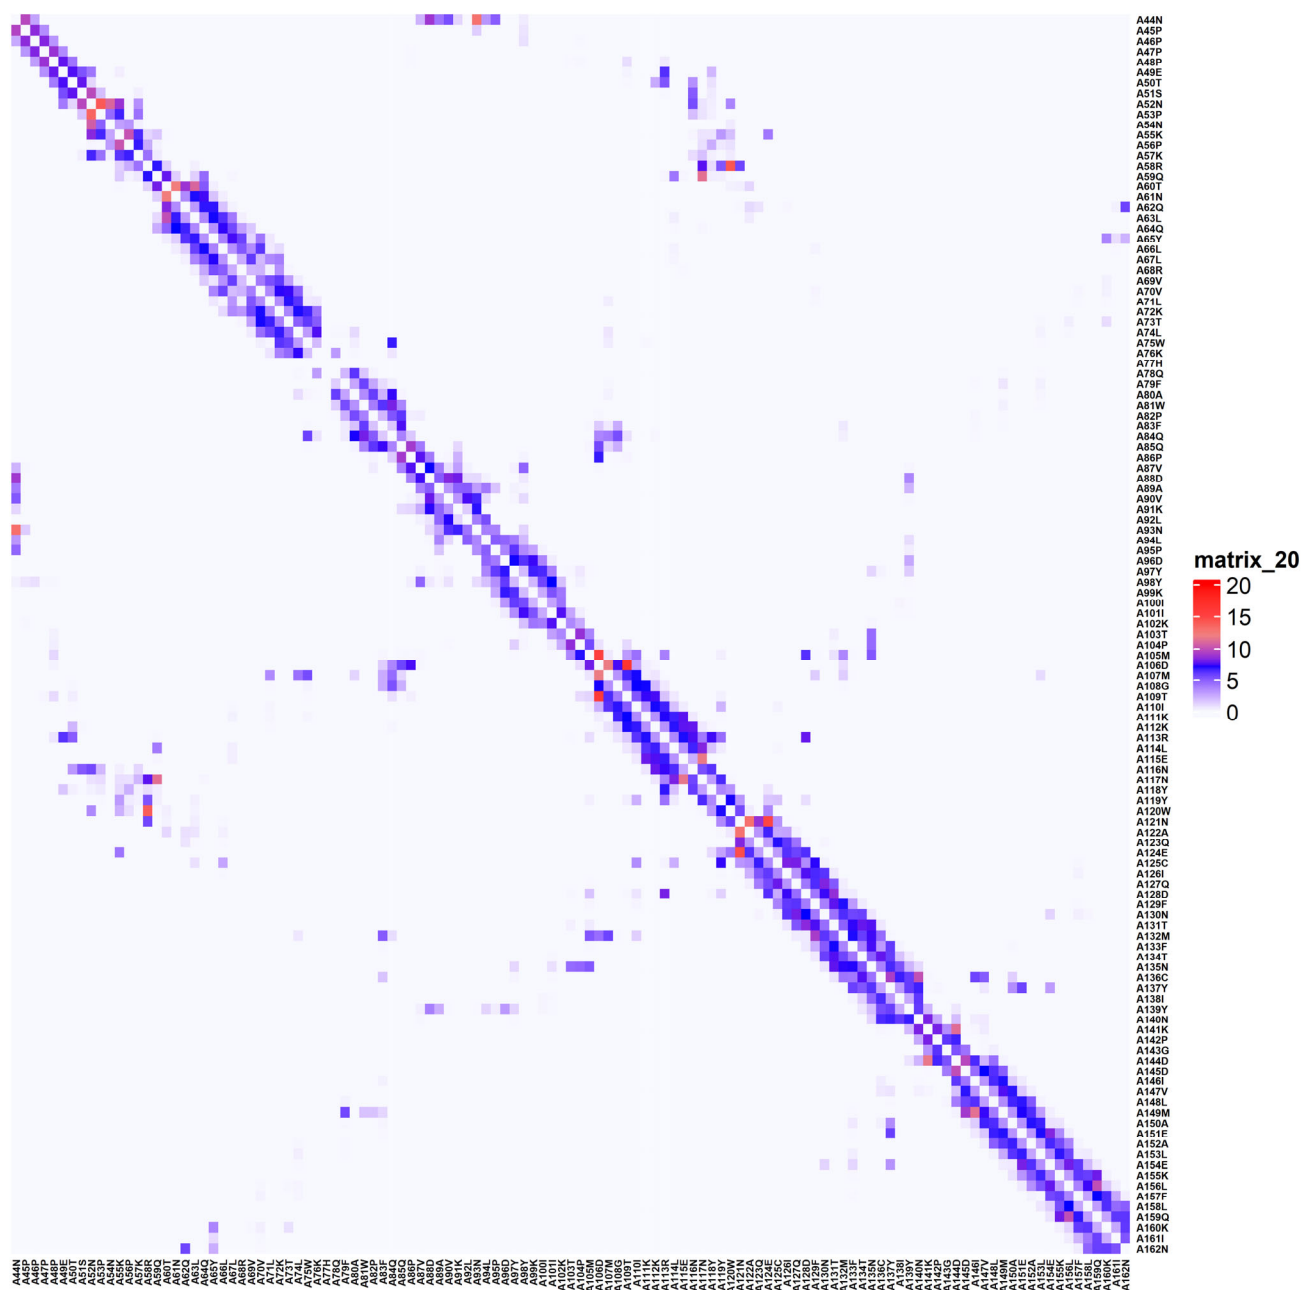

**Figure S10.** The average interaction volume of residue-residue contacts of 4 states of BRBD4.



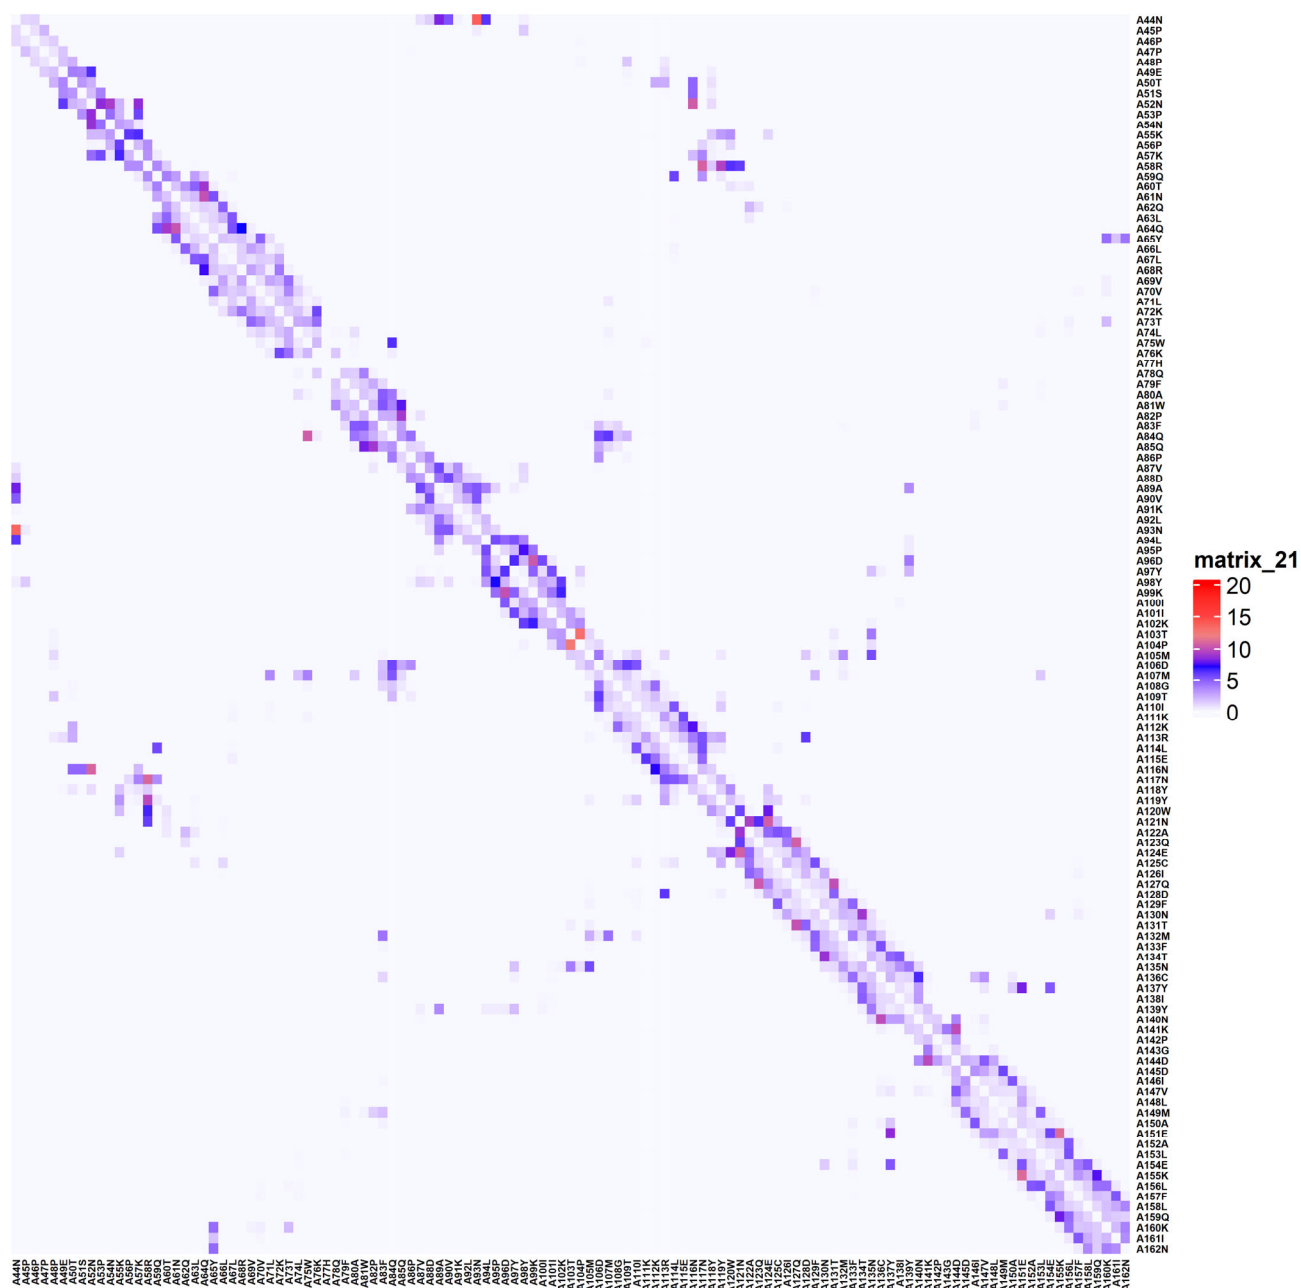

**Figure S11.** The range (Max-Min) of residue-residue contact volumes of 4 states of BRBD4.

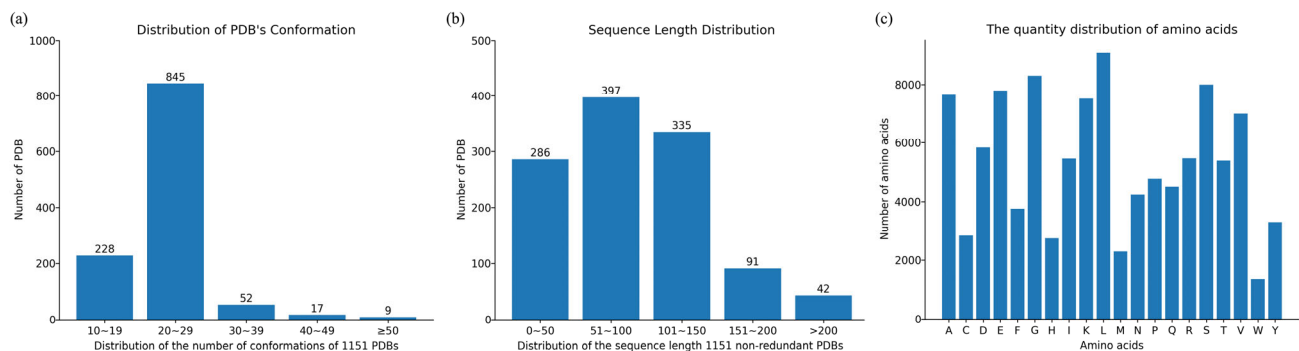

**Figure S12.** Features of the 1,151 structures solved using NMR technology.

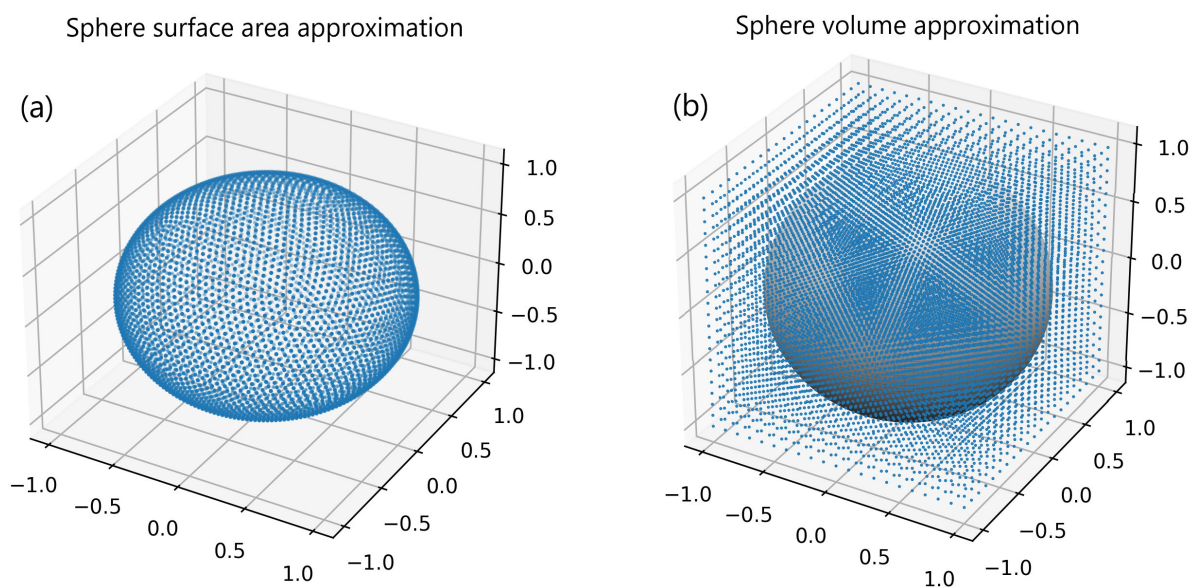

**Figure S13.** (a) Sphere surface area approximation. This demonstrates a sphere shell uniformly divided into 1000 grids, each representing a small area; (b) Sphere volume approximation. The volume of the sphere is divided by cubic grids in three-dimensional space.

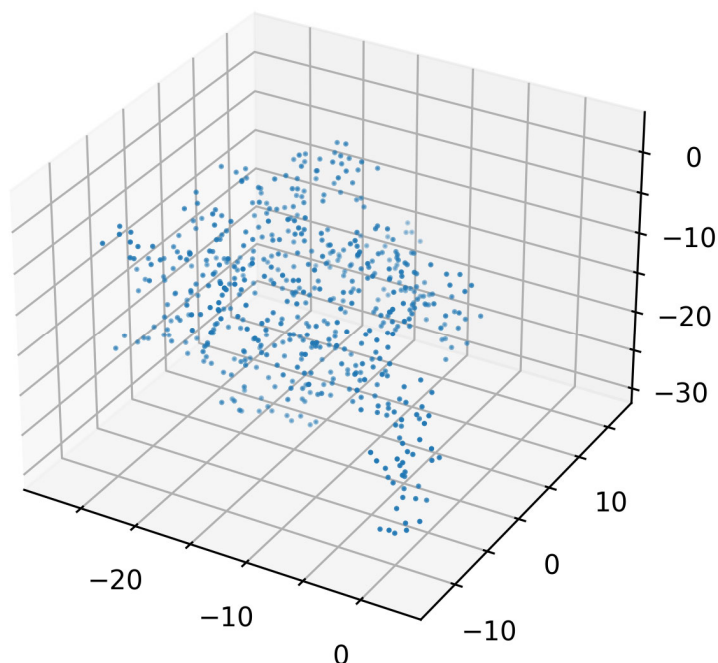

**Figure S14.** Simple visualization for heavy atoms in PDB 1A0N (MODEL 1).

**Table S1.** PDBs used for performance comparison.

| X-ray diffraction PDB ID                                                                                                                                                                                                                                                                                                                                                                                                                                                                                                                                                                                               | Solution NMR PDB ID                                                                                                                                                                                                                                                                                        |
|------------------------------------------------------------------------------------------------------------------------------------------------------------------------------------------------------------------------------------------------------------------------------------------------------------------------------------------------------------------------------------------------------------------------------------------------------------------------------------------------------------------------------------------------------------------------------------------------------------------------|------------------------------------------------------------------------------------------------------------------------------------------------------------------------------------------------------------------------------------------------------------------------------------------------------------|
| 1HJE, 1EJG, 1IUA, 1R6J, 1UCS, 1FY5, 1FY4, 1GDN, 1FN8, 1PQ7, 1YK4, 2DSX, 1GCI, 1W0N, 1X6Z, 2IZQ, 2B97, 2PVE, 2VB1, 1US0, 2WFI, 3AL1, 3A38, 3A39, 2I16, 2I17, 3NIR, 2WFJ, 2QXW, 3MFJ, 4G13, 3MI4, 4HP2, 3X34, 3X2M, 3BCJ, 2IXT, 3W5H, 4I8H, 4I8G, 4NAG, 4M7G, 3D43, 4LB3, 4LB4, 5AL6, 4LBR, 4LBS, 5D8V, 4ZM7, 5OQZ, 5TDA, 5KWM, 5GV7, 5MN1, 5GV8, 6ANN, 5WQQ, 5MNK, 6MW0, 6MW1, 6MW2, 6E6O, 6TOV, 6UF7, 6UF8, 5WQR, 6UFA, 4REK, 4UA6, 6SYJ, 5YCE, 7A5M, 7TLS, 7TLU, 7TME, 7TMH, 7FEZ, 7TMI, 6JGJ, 7KR0, 6ZM8, 7R2H, 6L27, 7WKB, 8C5N, 1DPL, 1CBN, 2O9S, 3X32, 6MVZ, 3X2L, 2JFR, 7ETN, 1N55, 2VXN, 2J8T, 4Y9W, 8C3X, 6MZ2 | 8B4R, 7YRV, 8B4S, 8BD2, 7XX9, 7XX8, 8AU4, 8A4F, 8BFG, 8BDV, 8BGF, 8BO0, 8BWW, 8ENP, 8CGF, 8CH7, 8EP5, 8ERU, 8F04, 8FD4, 8FA3, 8GUC, 8FKM, 8GQO, 8FG1, 8GXT, 8HR3, 8HVS, 8I53, 8IM5, 8P66, 8PEK, 8POL, 8PWT, 8QHH, 8QHI, 8SED, 8SEM, 8SVB, 8SXM, 8TT7, 8TV4, 8TXS, 8TZM, 8U27, 8ULM, 8UBH, 8WWX, 8BWT, 8HWU |

**Table S2.** PDB groups for protein SPI1 structures.

|      | Q226                                                 | E226       |
|------|------------------------------------------------------|------------|
| D28C | 8E3K, 8E4H, 8E5Y, 8EBH, 8EJ6, 8EKV, 8ENG, 8EO1, 8EO4 | 8EK3, 8EMD |
| D28T | 8E3R, 8EE9, 8EKJ, 8EQG                               | 8EJ8       |
